# Supplementary material
Source: PubMed Central journal article supplement (PMC5823236)
Supplement: NIHMS76272-supplement-Supplementary_data.pdf [file NIHMS76272-supplement-Supplementary_data.pdf]

## Supplemental Figures

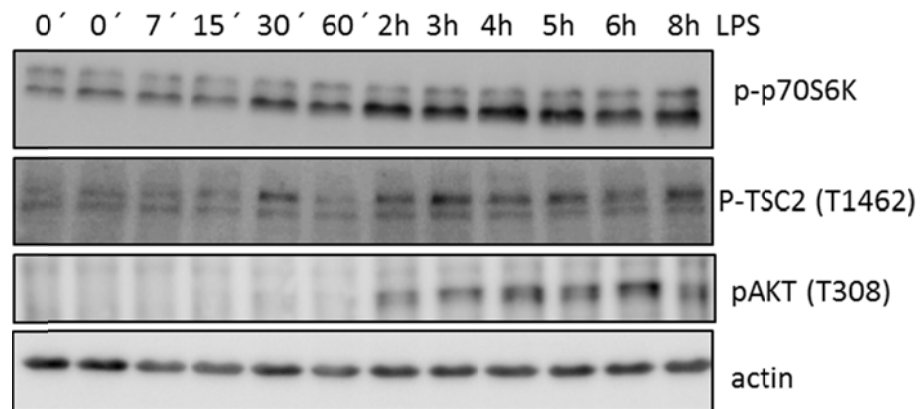

**Supplemental Figure 1: Time-dependent activation of the mTOR signaling pathway upon LPS stimulation.** J774.1 cells were treated with LPS (100 ng/mL) for the indicated periods of time. Then total cell lysates were subjected to western blot analysis for phospho-p70S6K (Ser389), phospho-TSC2 (Thr1462) and phospho-AKT (Thr308) and actin as loading control.

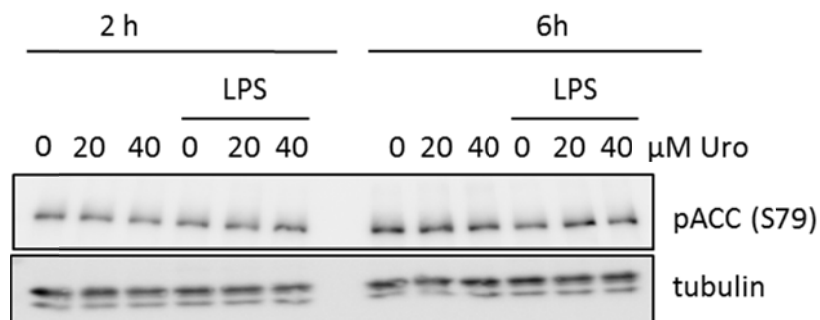

**Supplemental Figure 2: Influence of urolithin A on AMPK activity in macrophages.** Murine macrophages were treated with 20 and 40 μM urolithin A (Uro) in the presence and absence of LPS for 2 and 6 hours. Cell lysates were prepared and subjected to western blot analysis for phospho-ACC (Ser79) and actin. Representative blots from two independent experiments with consistent results are depicted.

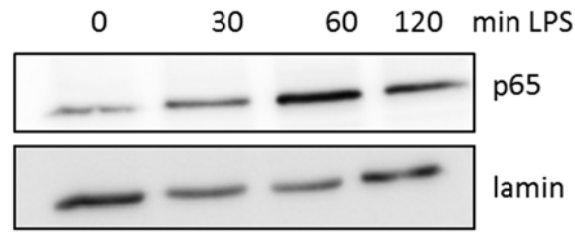

**Supplemental Figure 3: Time-dependent nuclear translocation of p65 to the nucleus upon LPS stimulation.** J774.1 cells were treated with LPS (100 ng/mL) for 30, 60 and 120 minutes. Then nuclear protein was isolated and subjected to western blot analysis for p65 and lamin B.

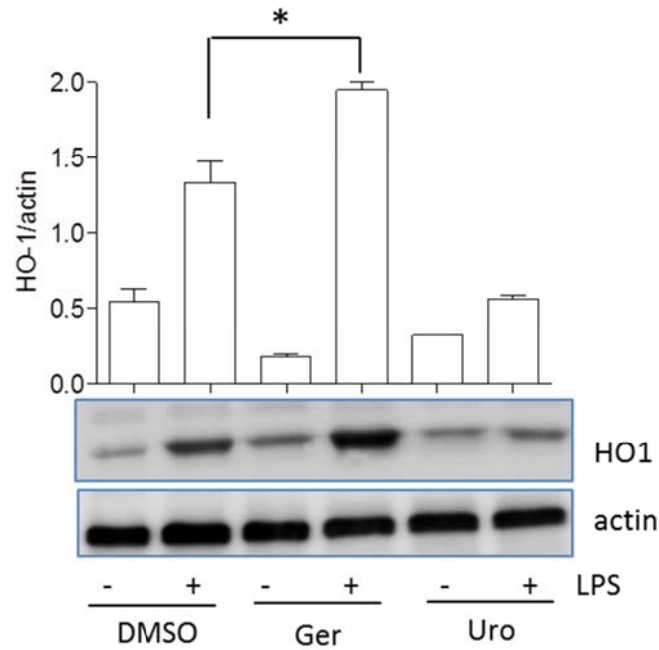

**Supplemental Figure 4: Influence of geraniin and urolithin A on HO-1 expression in LPS –stimulated macrophages.** J774.1 cells were treated with DMSO, geraniin (Ger, 40  $\mu$ M) or urolithin A (Uro, 40  $\mu$ M) and LPS (100 ng/mL) for 24 hours. Then total cell lysates were extracted and subjected to western blot analysis for HO-1 and actin. Representative blots and compiled densitometric data are depicted. (n=3, \*, p<0.05)
